# Supplementary material
Source: MDPI journal article supplement (https://www.mdpi.com/2073-4441/14/6/848)
Supplement: s1 [file s1]

# **Study on the effect of water flux in osmotic microbial fuel cells to membrane water content and resistance**

**Yang Zhao<sup>1,2,3</sup>, Yonghui Song<sup>1,3\*</sup>, Liang Duan<sup>1,3</sup>,**

*<sup>1</sup> State Key Joint Laboratory of Environment Simulation and Pollution Control, School of Environment, Tsinghua University, Beijing 100084, China*

*<sup>2</sup> State Key Laboratory of Environmental Criteria and Risk Assessment, Chinese Research Academy of Environmental Sciences, Dayangfang 8, Anwai Beiyuan, Beijing 100012, China*

*<sup>3</sup> Research Department of Basin Water Environmental Governance, Chinese Research Academy of Environmental Sciences, Dayangfang 8, Anwai Beiyuan, Beijing 100012, China*

\*Corresponding authors. Tel.: +86 10 84915308; Fax: +86 10 84915194

E-mail addresses: [duanliang@craes.org.cn](mailto:duanliang@craes.org.cn)

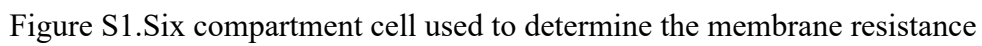

Figure S1. Six compartment cell used to determine the membrane resistance

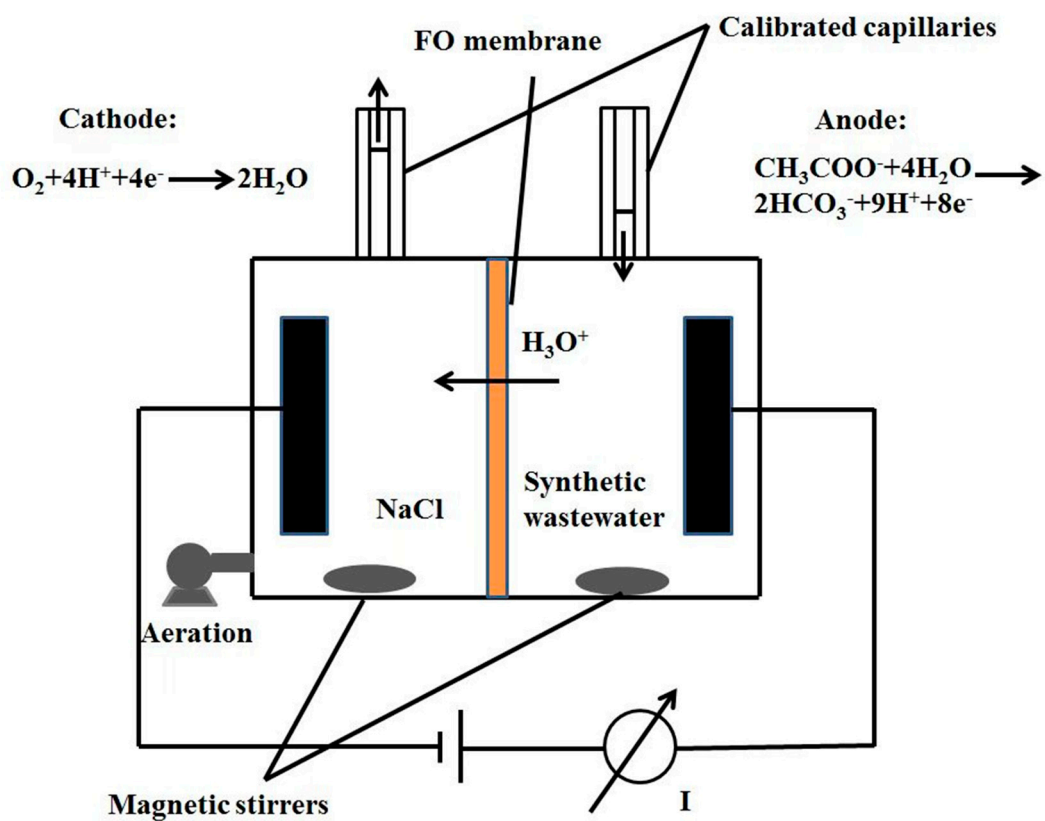

Figure S2. Set-up for measurement of the water transport number  $t_{\text{H}_2\text{O}}$ .

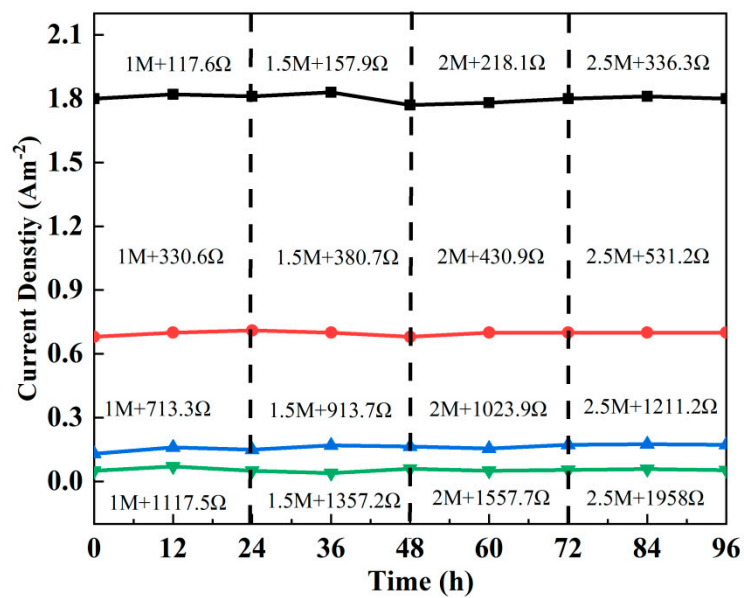

Figure S3 Similar current generation under different conditions (1M NaCl as catholyte/117.6 Ω external resistance initially and 2.5M NaCl as catholyte/2358 Ω external resistance finally)
